# Supplementary material
Source: PubMed Central journal article supplement (PMC4529784)
Supplement: NIHMS696316-supplement-Supp_FigureS1-S4.pdf [file NIHMS696316-supplement-Supp_FigureS1-S4.pdf]

A

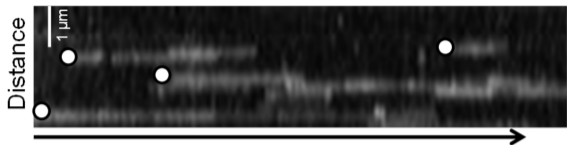

B

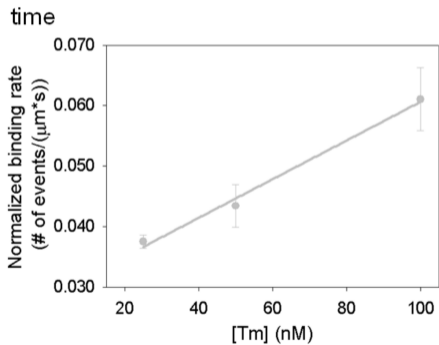

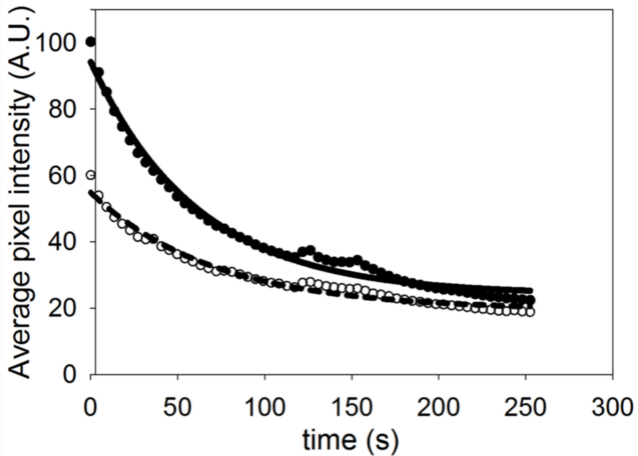

Supplemental Figure S2

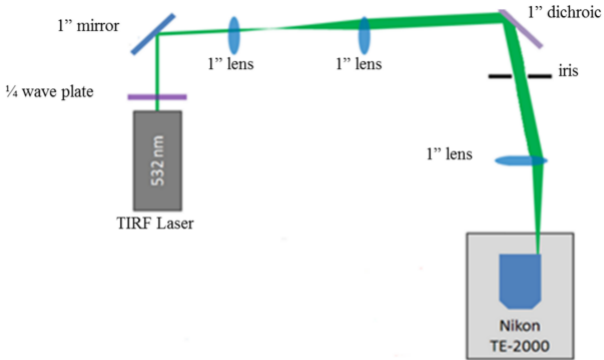

Supplemental Figure 3

Tropomyosin

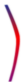

+

Alexa-532 maleimide

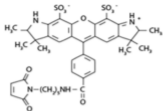

Na<sup>+</sup>

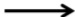

Alexa-532 Tropomyosin

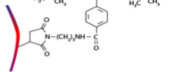

Tropomyosin

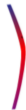

+

Cy3 maleimide

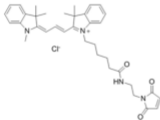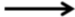

Cy3-Tropomyosin

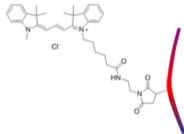

*\*Drawings not to scale*
